# Supplementary material for: Co-delivery of Salinomycin and Curcumin for Cancer Stem Cell Treatment by Inhibition of Cell Proliferation, Cell Cycle Arrest, and Epithelial–Mesenchymal Transition
Source: PubMed Central journal article supplement (PMC7843432; doi:10.3389/fchem.2020.601649), 2021-01-15
Supplement: Data_Sheet_1.pdf [file Data_Sheet_1.pdf]

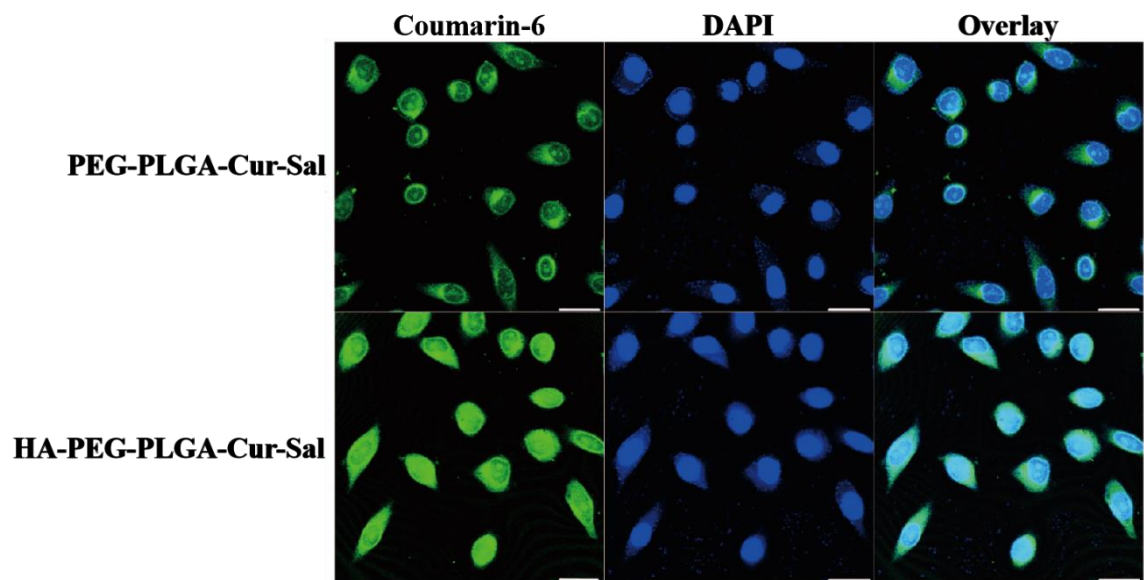

**Figure S3.** Confocal fluorescence micrographs of MCF-7 cells after 4 h incubation in same concentration of coumarin-6: (A) Untargeted PLGA-SAL-CUR, and (B) Targeted HA-PLGA-SAL-CUR. Scalebar denotes 25  $\mu\text{m}$ .
